# Supplementary material
Source: publisher figshare collection journal article supplement (https://sage.figshare.com/ndownloader/files/13802606)
Supplement: Supplementary file 1 [file 13802606]

## Anaesthesia in fish larvae and nonpharmacological methods to immobility

The anaesthetic and analgesic protocols that are adequate for larval fish are usually not the same as those that are appropriate for adults, which is outside the scope of this review. In general, anaesthetics are only delivered to larvae via immersion. As larvae do not yet have fully developed gills, most of the absorption of the anaesthetic agents occurs exclusively through their cutaneous surface and yolk surface, which show a higher tolerance to immersive substances.<sup>1</sup>

Most anaesthetics can be used to reduce stress, and some of them provide analgesia; however, non-pharmacological measures, such as refinement techniques, can also be used to manage stress. Tonic immobility is a technique that is used widely to induce the loss of muscle tone and immobilize elasmobranchs (i.e., sharks, skates and rays). It is mainly achieved by inverting the fish ventral side up. This method has shown benefits over chemical anaesthetics as it avoids the risk of overdose, does not require the uptake of chemicals and induces a minimal disruption of respiration, thus providing immediate full recovery. However, some studies reported a violent arousal from this state and additional research is needed to establish whether this is truly a non-stressful event.<sup>2</sup> Gradual cooling<sup>3</sup> and electricity<sup>4</sup> are other non-chemical methods that have been used to calm and/or immobilize fish; however, these techniques do not allow the achievement of a real anaesthesia state as they do not completely block nerve conduction, and fish may be able to feel pain.<sup>5</sup> Moreover, the safety margins are narrow,<sup>6</sup> and the animal's physiology may be affected.<sup>7</sup> Researchers may consider these non-pharmacological methods depending on the experiment, but they will not be discussed in this review.

1. Neiffer DL and Stamper MA. Fish sedation, analgesia, anesthesia, and euthanasia: considerations, methods, and types of drugs. *ILAR J.* 2009; 50: 343-360.

2. Williamson MJ, Dudgeon C and Slade R. Tonic immobility in the zebra shark, *Stegostoma fasciatum*, and its use for capture methodology. *Environ Biol Fish.* 2018; 101: 741–748.
3. Hovda J and Linley TJ. The potential application of hypothermia for anesthesia in adult Pacific salmon. *N Am J Aquacult.* 2000; 62: 67-72.
4. Walker MK, Yanke EA and Gingerich WH. Use of electronarcosis to immobilize juvenile and adult northern pike. *Prog Fish-Cult.* 1994; 56: 237-243.
5. Matthews M and Varga ZM. Anesthesia and euthanasia in zebrafish. *ILAR J.* 2012; 53: 192-204.
6. Ross LG and Ross B. *Anaesthetic and sedative techniques for aquatic animals.* 3rd ed. Oxford: Blackwell Publishing, 2008.
7. Gao Y, Li D, Peng X, et al. Effects of low-voltage constant direct current on plasma biochemical profiles and gene expression levels in crucian carp *Carassius carassius*. *Fish Sci.* 2014; 80: 993-1000.
